# Supplementary material for: Detection of Carbapenemase-producing Klebsiella pneumoniae isolated from Environmental Sources in a Tertiary Health Institution in Nigeria.
Source: Research Square preprint supplement (doi:10.21203/rs.3.rs-42624/v3), 2021-01-04
Supplement: Supplementary file 1 [file 02c88a1702bc2064a52dd10e.xlsx]

## Sheet: Table S4
S/N	Sample Site	Isolate	Ampicillin	Amoxicillin-clavulanate	Trimethiprin-sulphamethoxazole	Cefuroxime	Cefotaxime	Ceftazidime	Cefepime	Gentamicin	Ertapenem	Meropenem	Imipenem	Ciprofloxacin	Tetracycline	Isolate that were MDR	Isolates that were XDR	Isolates that were MHT POSITIVE	KPC Gene Detected
1	Bed	K1	R	R	R	R	R	R	R	R	R	R	R	R	R	YES	YES	YES	NO
2	Bed	K2	R	S	R	R	S	S	S	S	S	S	S	S	R	YES	NO	NO	NO
3	Bed	K3	R	R	R	R	R	R	R	S	R	R	S	R	R	YES	YES	YES	NO
4	Bed	K4	R	R	R	R	R	R	R	R	R	S	S	R	R	YES	YES	YES	NO
5	Bed	K5	R	R	R	R	R	S	S	R	S	S	S	S	R	YES	NO	NO	NO
6	Bed	K6	R	R	R	R	R	R	R	R	R	R	R	R	R	YES	YES	YES	NO
7	Bed Table	K7	R	R	R	R	R	R	R	R	R	R	R	R	R	YES	YES	YES	NO
8	Bed Table	K8	R	R	R	R	S	S	S	S	S	S	S	S	R	YES	NO	NO	NO
9	Chlorhexidine	K9	R	R	R	R	R	R	R	R	R	R	R	R	R	YES	YES	YES	NO
10	Cupboard	K10	R	R	R	R	R	R	S	R	S	S	S	R	R	YES	NO	NO	NO
11	Cupboard	K11	R	R	R	R	R	R	R	R	S	R	I	R	R	YES	YES	YES	NO
12	Cupboard	K12	R	R	R	R	S	S	S	S	S	S	S	S	R	YES	NO	NO	NO
13	Cupboard	K13	R	R	R	R	R	R	R	R	R	S	S	R	R	YES	YES	YES	NO
14	Hand Wash	K14	R	R	R	R	S	S	S	R	S	S	S	S	R	YES	NO	NO	NO
15	Forceps	K15	R	R	R	R	R	S	S	S	S	S	S	S	R	YES	NO	NO	NO
