# Supplementary material for: Detection of Carbapenemase-producing Klebsiella pneumoniae isolated from Environmental Sources in a Tertiary Health Institution in Nigeria.
Source: Research Square preprint supplement (doi:10.21203/rs.3.rs-42624/v3), 2021-01-04
Supplement: Supplementary file 2 [file ac9ff7f156b3da25d7413444.docx]

**Additional file 3: Table S3**

This file describes the frequencies of various bacteria isolated from different sample sources in the wards of Nnamdi Azikiwe University Teaching Hospital in the study period.

**Table S3: Distribution of Organisms Isolated from the Sampled Hospital Sources**

| **Source (n)** | **Organisms Isolated** | | | | | | |
| --- | --- | --- | --- | --- | --- | --- | --- |
| ***S. aureus***  **(%)** | ***E. coli***  **(%)** | ***K. pneumoniae***  **(%)** | ***Providencia species***  **(%)** | ***P. aeruginosa***  **(%)** | ***A. baumanii***  **(%)** | ***S.***  ***typhimurium***  **(%)** |
| **Bed Table(39)** | 22 | 13 | 2 | 0 | 2 | 0 | 0 |
| **Bed(42)** | 21 | 12 | 6 | 0 | 3 | 0 | 0 |
| **Hand Wash(5)** | 1 | 1 | 1 | 0 | 2 | 0 | 0 |
| **Door Handle(1)** | 0 | 1 | 0 | 0 | 0 | 0 | 0 |
| **Drip Stand(0)** | 0 | 0 | 0 | 0 | 0 | 0 | 0 |
| **Taps(4)** | 0 | 0 | 0 | 0 | 3 | 0 | 1 |
| **Drug Mortar(0)** | 0 | 0 | 0 | 0 | 0 | 0 | 0 |
| **Spirit(0)** | 0 | 0 | 0 | 0 | 0 | 0 | 0 |
| **Trolley(2)** | 0 | 2 | 0 | 0 | 0 | 0 | 0 |
| **Sphig.(1)** | 0 | 1 | 0 | 0 | 0 | 0 | 0 |
| **Suction Tube(0)** | 0 | 0 | 0 | 0 | 0 | 0 | 0 |
| **Chlorhexidine(3)** | 0 | 0 | 1 | 0 | 1 | 1 | 0 |
| **Hypochlorite(0)** | 0 | 0 | 0 | 0 | 0 | 0 | 0 |
| **Forceps(1)** | 0 | 0 | 1 | 0 | 0 | 0 | 0 |
| **K/Dish(1)** | 0 | 1 | 0 | 0 | 0 | 0 | 0 |
| **Cupboards(39)** | 27 | 6 | 4 | 1 | 0 | 1 | 0 |
| **Wheel Chair(2)** | 1 | 1 | 0 | 0 | 0 | 0 | 0 |
| **Doctors Desk(0)** | 0 | 0 | 0 | 0 | 0 | 0 | 0 |
| **Nurses Desk(2)** | 2 | 0 | 0 | 0 | 0 | 0 | 0 |
| **Iodine(0)** | 0 | 0 | 0 | 0 | 0 | 0 | 0 |
| **P/Oximeter(0)** | 0 | 0 | 0 | 0 | 0 | 0 | 0 |
| **Total 142/534** | **74(52.11)** | **38(26.76)** | **15(10.56)** | **1(0.70)** | **11(7.75)** | **2(1.41)** | **1(0.70)** |

Sphig. = Sphigmomanometer; K/Dish = Kidney dish; P/Oximeter = Pulse Oximeter
